# Supplementary material for: Immunoglobulin replacement products confer in vivo protection against SARS-CoV-2 XBB.1.5 Omicron variant despite poor neutralizing activity
Source: JCI journal article supplement (doi:10.1172/jci.insight.176359), 2024-01-04
Supplement: sd1 [file 1]

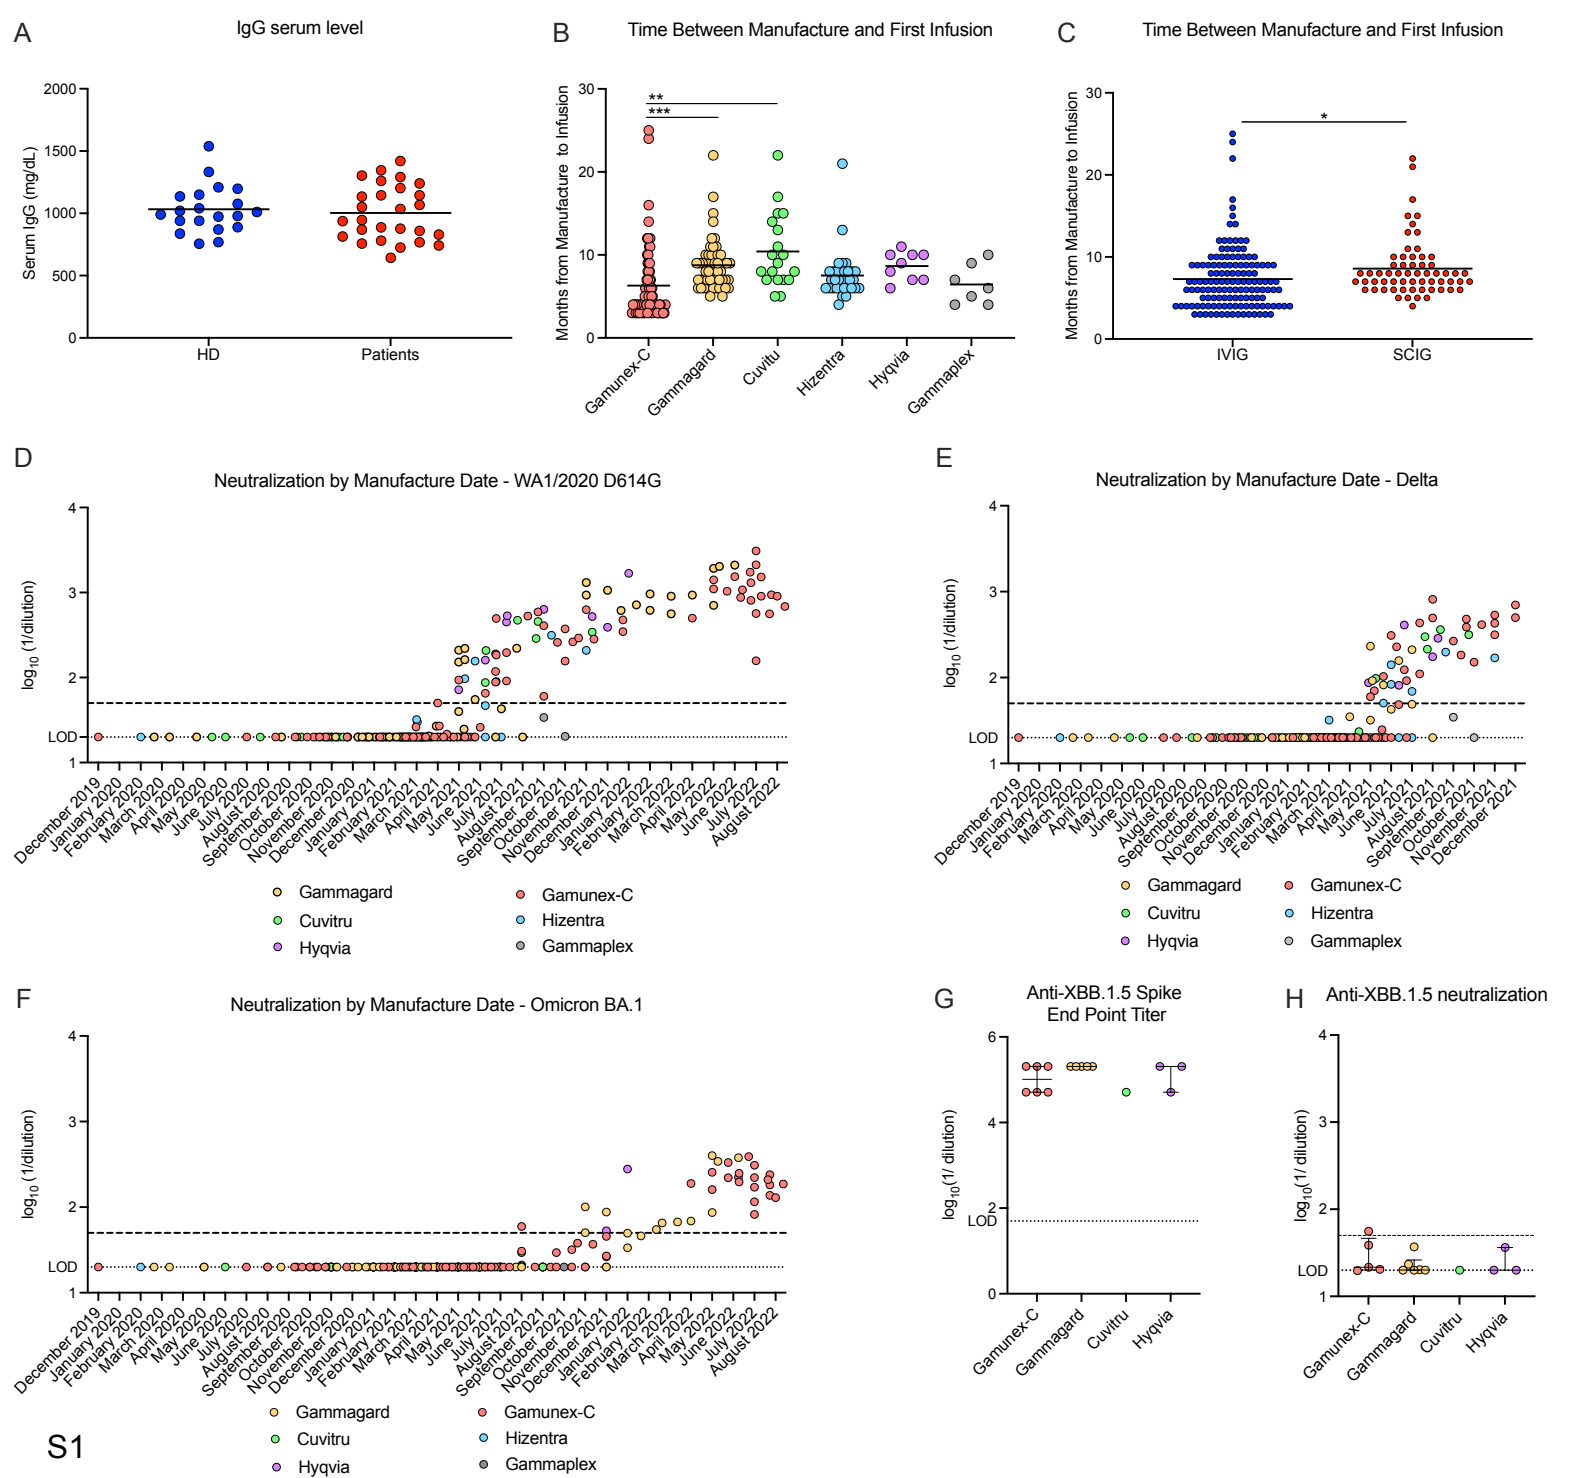

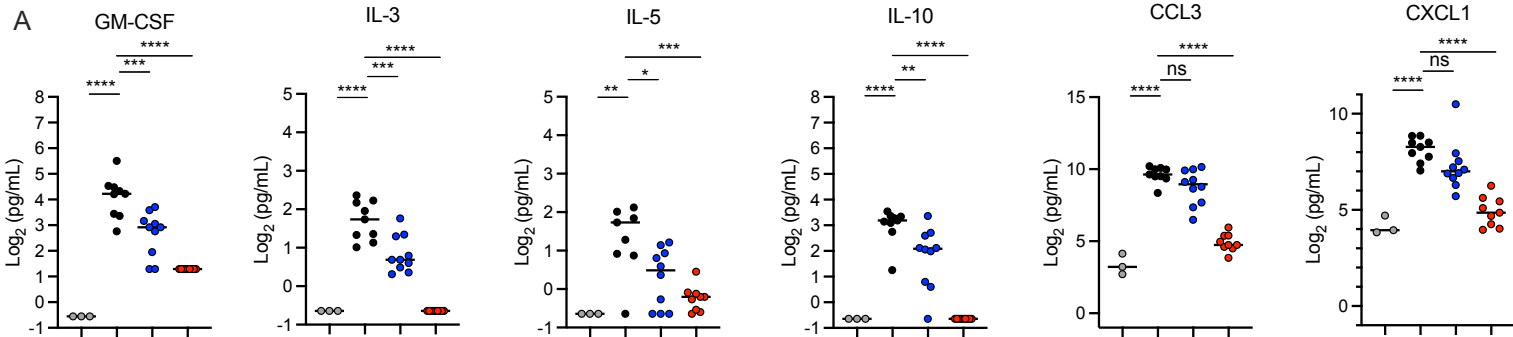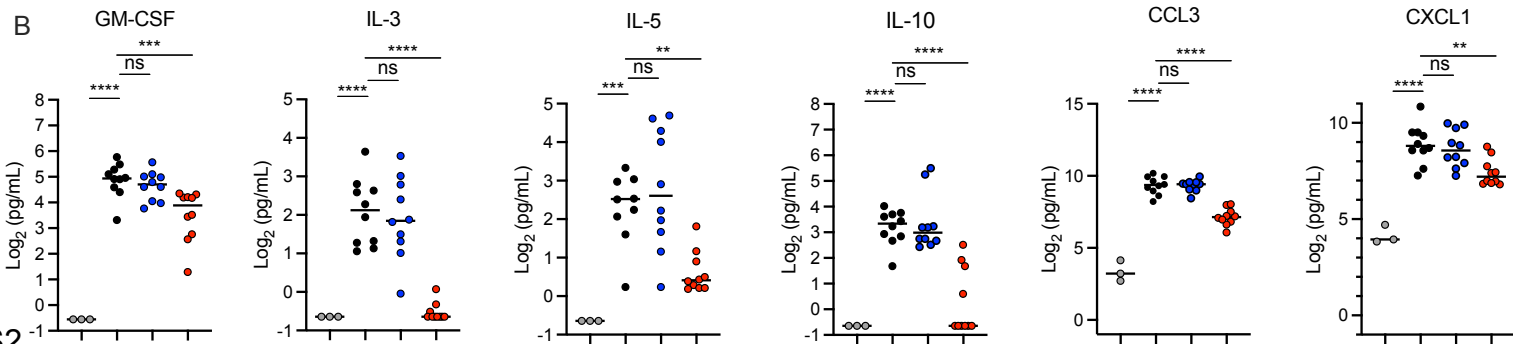

**Table S1. Anti-spike antibody titer and SARS-CoV-2 neutralization activity in 198 IVIG and SCIG lots.**

| IVIG product | Lot number | Expiration date (refrigerated) | Manufacture Date | First Infusion Month | Anti-Wuhan-1 spike antibody end point titers | WA1/2020 Neutralization | Delta Neutralization | Omicron BA.1 Neutralization | Omicron BQ.1.1 Neutralization | Anti-XBB.1.5 spike antibody end point titers | XBB.1.5 Neutralization |
|--------------|------------|--------------------------------|------------------|----------------------|----------------------------------------------|-------------------------|----------------------|-----------------------------|-------------------------------|----------------------------------------------|------------------------|
| CUVITRU      | LE13W047AB | May-23                         | May-20           | August-21            | 50                                           | 20.00                   | 20                   | 20                          | --                            | --                                           | --                     |
| CUVITRU      | LE13W055AC | June-23                        | June-20          | March-22             | 3200                                         | 20.00                   | 20                   | 20                          | --                            | --                                           | --                     |
| CUVITRU      | LE13W070AB | August-23                      | August-20        | September-21         | 200                                          | 20.00                   | 20                   | 20                          | --                            | --                                           | --                     |
| CUVITRU      | LE13W097AC | October-23                     | October-20       | August-21            | 200                                          | 20.00                   | 20                   | 20                          | --                            | --                                           | --                     |
| CUVITRU      | LE13W103AB | November-23                    | November-20      | October-21           | 200                                          | 20.00                   | 20                   | 20                          | --                            | --                                           | --                     |
| CUVITRU      | LE13X057AC | November-23                    | November-20      | April-22             | 200                                          | 20.00                   | 20                   | 20                          | --                            | --                                           | --                     |
| CUVITRU      | LE13W109AB | November-23                    | November-20      | January-22           | 200                                          | 20.00                   | 20                   | 20                          | --                            | --                                           | --                     |
| CUVITRU      | LE13W109AC | November-23                    | November-20      | February-22          | 3200                                         | 20.00                   | 20                   | 20                          | --                            | --                                           | --                     |
| CUVITRU      | LE13X012AB | February-24                    | February-21      | September-21         | 800                                          | 20.00                   | 20                   | 20                          | --                            | --                                           | --                     |
| CUVITRU      | LE13X020AB | February-24                    | February-21      | October-21           | 800                                          | 20.00                   | 20                   | 20                          | --                            | --                                           | --                     |
| CUVITRU      | LE13X032AB | March-24                       | March-21         | August-21            | 800                                          | 20.00                   | 20                   | 20                          | --                            | --                                           | --                     |
| CUVITRU      | LE13X039AB | April-24                       | April-21         | August-21            | 800                                          | 20.00                   | 20                   | 20                          | --                            | --                                           | --                     |
| CUVITRU      | LE13X048AB | May-24                         | May-21           | January-22           | 3200                                         | 20.02                   | 23.5                 | 20                          | --                            | --                                           | --                     |
| CUVITRU      | LE13X059AB | June-24                        | June-21          | March-22             | 3200                                         | 87.33                   | 97.85                | 20                          | --                            | --                                           | --                     |
| CUVITRU      | LE13X073AB | July-24                        | July-21          | February-22          | 51200                                        | 207.90                  | 213.8                | 20                          | --                            | --                                           | --                     |
| CUVITRU      | LE13X084AB | August-24                      | August-21        | March-22             | 12800                                        | 473.40                  | 298.6                | 29.41                       | --                            | --                                           | --                     |
| CUVITRU      | LE13X087AC | August-24                      | August-21        | April-22             | 51200                                        | 455.60                  | 361.1                | 20.68                       | --                            | --                                           | --                     |
| CUVITRU      | LE13X088AB | September-24                   | September-21     | March-22             | 51200                                        | 287.90                  | 315.4                | 20                          | --                            | --                                           | --                     |
| CUVITRU      | LE13X133AB | December-24                    | December-21      | October-22           | 12800                                        | 342.00                  | --                   | 20                          | 20                            | 51200                                        | 20.00                  |

| IVIG product | Lot number | Expiration date (refrigerated) | Manufacture Date | First Infusion Month | Anti-Wuhan-1 spike antibody end point titers | Washington Neutralization | Delta Neutralization | Omicron Neutralization | BQ.1.1 | Anti-XBB.1.5 spike antibody end point titers | XBB.1.5 Neutralization |
|--------------|------------|--------------------------------|------------------|----------------------|----------------------------------------------|---------------------------|----------------------|------------------------|--------|----------------------------------------------|------------------------|
| Gammagard    | LE08W010AD | March-22                       | March-20         | August-21            | 50                                           | 20.00                     | 20                   | 20                     | --     | --                                           | --                     |
| Gammagard    | LE08W010AE | March-22                       | March-20         | January-22           | 50                                           | 20.00                     | 20                   | 20                     | --     | --                                           | --                     |
| Gammagard    | LE08W016AB | May-22                         | May-20           | August-21            | 800                                          | 20.00                     | 20                   | 20                     | --     | --                                           | --                     |
| Gammagard    | LE08W026AD | September-22                   | September-20     | August-21            | 800                                          | 20.00                     | 20                   | 20                     | --     | --                                           | --                     |
| Gammagard    | LE08W033AC | November-22                    | November-20      | September-21         | 3200                                         | 20.00                     | 20                   | 20                     | --     | --                                           | --                     |
| Gammagard    | LE08W036AD | November-22                    | November-20      | September-21         | 200                                          | 20.00                     | 20                   | 20                     | --     | --                                           | --                     |
| Gammagard    | LE08W037AE | November-22                    | November-20      | August-21            | 3200                                         | 20.00                     | 20                   | 20                     | --     | --                                           | --                     |
| Gammagard    | LE12X024AC | December-23                    | December-20      | January-22           | 200                                          | 20.00                     | 20                   | 20                     | --     | --                                           | --                     |
| Gammagard    | LE08W038AC | December-22                    | December-20      | August-21            | 200                                          | 20.00                     | 20                   | 20                     | --     | --                                           | --                     |
| Gammagard    | LE08W039AC | December-22                    | December-20      | August-21            | 3200                                         | 20.00                     | 20                   | 20                     | --     | --                                           | --                     |
| Gammagard    | C21G010AAA | January-24                     | January-21       | August-21            | 800                                          | 20.00                     | 20                   | 20                     | --     | --                                           | --                     |
| Gammagard    | LE08X001AC | January-23                     | January-21       | October-21           | 200                                          | 20.00                     | 20                   | 20                     | --     | --                                           | --                     |
| Gammagard    | LE08X002AC | January-23                     | January-21       | October-21           | 200                                          | 20.00                     | 20                   | 20                     | --     | --                                           | --                     |
| Gammagard    | LE12X021AB | January-24                     | January-21       | August-21            | 200                                          | 20.00                     | 20                   | 20                     | --     | --                                           | --                     |
| Gammagard    | le08x003ac | February-23                    | February-21      | November-21          | 200                                          | 20.00                     | 20                   | 20                     | --     | --                                           | --                     |
| Gammagard    | LE12X034AB | February-24                    | February-21      | August-21            | 200                                          | 20.00                     | 20                   | 20                     | --     | --                                           | --                     |
| Gammagard    | LE08X004AC | February-23                    | February-21      | December-21          | 800                                          | 20.00                     | 20                   | 20                     | --     | --                                           | --                     |
| Gammagard    | LE08X005AE | February-23                    | February-21      | November-21          | 200                                          | 20.00                     | 20                   | 20                     | --     | --                                           | --                     |
| Gammagard    | LE08X005AJ | February-23                    | February-21      | November-21          | 200                                          | 20.00                     | 20                   | 20                     | --     | --                                           | --                     |
| Gammagard    | LE12X043AB | February-24                    | February-21      | September-21         | 200                                          | 20.00                     | 20                   | 20                     | --     | --                                           | --                     |
| Gammagard    | C21G029AAA | May-24                         | March-21         | October-21           | 800                                          | 20.00                     | 20                   | 20                     | --     | --                                           | --                     |
| Gammagard    | LE08X006AC | March-23                       | March-21         | December-21          | 800                                          | 20.00                     | 20                   | 20                     | --     | --                                           | --                     |
| Gammagard    | LE12X072AB | March-24                       | March-21         | September-21         | 800                                          | 20.00                     | 20                   | 20                     | --     | --                                           | --                     |
| Gammagard    | LE12X073AB | March-24                       | March-21         | November-21          | 800                                          | 20.00                     | 20                   | 20                     | --     | --                                           | --                     |
| Gammagard    | LE08X008AC | March-23                       | March-21         | January-22           | 200                                          | 20.00                     | 20                   | 20                     | --     | --                                           | --                     |
| Gammagard    | C21G036AAA | March-24                       | March-21         | September-21         | 800                                          | 20.00                     | 20                   | 20                     | --     | --                                           | --                     |
| Gammagard    | LE12X087AB | March-24                       | March-21         | December-21          | 3200                                         | 20.52                     | 20                   | 20                     | --     | --                                           | --                     |
| Gammagard    | LE08X010AE | April-23                       | April-21         | February-22          | 200                                          | 20.00                     | 20                   | 20                     | --     | --                                           | --                     |
| Gammagard    | LE12X110AB | April-24                       | April-21         | November-21          | 3200                                         | 26.87                     | 35.05                | 20                     | --     | --                                           | --                     |
| Gammagard    | LE08X012AC | May-23                         | May-21           | January-22           | 800                                          | 20.00                     | 20                   | 20                     | --     | --                                           | --                     |
| Gammagard    | C21G044AAA | May-24                         | May-21           | October-21           | 3200                                         | 24.74                     | 20                   | 20                     | --     | --                                           | --                     |
| Gammagard    | LE12X136AB | May-24                         | May-21           | November-21          | 12800                                        | 39.77                     | 32.03                | 20                     | --     | --                                           | --                     |
| Gammagard    | LE12X141AB | May-24                         | May-21           | January-22           | 12800                                        | 152.40                    | 232.3                | 20                     | --     | --                                           | --                     |
| Gammagard    | LE08X013AG | May-23                         | May-21           | December-21          | 51200                                        | 210.00                    | 92                   | 20                     | --     | --                                           | --                     |
| Gammagard    | C21G049AAA | June-24                        | June-21          | December-21          | 12800                                        | 55.14                     | 42.6                 | 20                     | --     | --                                           | --                     |
| Gammagard    | LE12X157AB | June-24                        | June-21          | December-21          | 12800                                        | 162.70                    | 157.7                | 20                     | --     | --                                           | --                     |
| Gammagard    | LE12X160AB | June-24                        | June-21          | December-21          | 800                                          | 20.00                     | 20                   | 20                     | --     | --                                           | --                     |
| Gammagard    | LE12X165AB | June-24                        | June-21          | February-22          | 51200                                        | 220.00                    | 82                   | 20                     | --     | --                                           | --                     |
| Gammagard    | LE12X171AB | July-24                        | July-21          | January-22           | 12800                                        | 220.90                    | 211.2                | 20                     | --     | --                                           | --                     |
| Gammagard    | C21G067AAA | July-24                        | July-21          | February-22          | 51200                                        | 42.81                     | 49.02                | 20                     | --     | --                                           | --                     |
| Gammagard    | LE12X187AB | August-24                      | August-21        | February-22          | 12800                                        | 20.00                     | 20                   | 20                     | --     | --                                           | --                     |
| Gammagard    | LE08X026AC | November-23                    | November-21      | October-22           | 204800                                       | 1309.00                   | --                   | 100.6                  | 25.79  | 204800                                       | 23.35                  |
| Gammagard    | LE08X027AC | November-23                    | November-21      | November-22          | 204800                                       | 934.20                    | --                   | 50.31                  | 25.15  | 204800                                       | 20.00                  |
| Gammagard    | LE08X029AC | December-23                    | December-21      | October-22           | 12800                                        | 1063.00                   | --                   | 87.75                  | 20     | 204800                                       | 20.21                  |
| Gammagard    | BE08C003AH | January-24                     | January-22       | October-22           | 51200                                        | 615.20                    | --                   | 33.45                  | 21.28  | --                                           | --                     |
| Gammagard    | BE08C003AJ | January-24                     | January-22       | October-22           | 204800                                       | 715.10                    | --                   | 49.68                  | 20     | 204800                                       | 20.00                  |
| Gammagard    | BE08C005AC | February-24                    | February-22      | October-22           | 204800                                       | 961.60                    | --                   | 54.77                  | 20     | 204800                                       | 20.00                  |
| Gammagard    | BE08C006AC | February-24                    | February-22      | November-22          | 204800                                       | 618.80                    | --                   | 46.14                  | 20     | --                                           | --                     |
| Gammagard    | BE08C007AC | March-24                       | March-22         | November-22          | 204800                                       | 904.60                    | --                   | 65.4                   | 21.14  | --                                           | --                     |
| Gammagard    | C22G049AAA | March-25                       | March-22         | October-22           | 51200                                        | 562.90                    | --                   | 67.02                  | 20     | --                                           | --                     |

|           |            |          |          |             |        |         |    |       |       |        |       |
|-----------|------------|----------|----------|-------------|--------|---------|----|-------|-------|--------|-------|
| Gammagard | BE08C010AC | April-24 | April-22 | November-22 | 204800 | 933.40  | -- | 68.86 | 23.91 | --     | --    |
| Gammagard | BE12CA96AB | May-25   | May-22   | October-22  | 51200  | 706.20  | -- | 86.57 | 23    | --     | --    |
| Gammagard | BE12C105AB | May-25   | May-22   | November-22 | 204800 | 1928.00 | -- | 400.2 | 86.6  | --     | --    |
| Gammagard | BE12C114AB | June-25  | June-22  | November-22 | 204800 | 2105.00 | -- | 342.9 | 82.34 | --     | --    |
| Gammagard | BE12CC27AB | June-25  | June-22  | November-22 | 51200  | 2027.00 | -- | 378   | 30.68 | 204800 | 36.99 |

| IVIg product | Lot number | Expiration date (refrigerated) | Manufacture Date | First Infusion Month | Anti-Wuhan-1 spike antibody end point titers | Washington Neutralization | Delta Neutralization | Omicron Neutralization | BQ.1.1 | Anti-XBB.1.5 spike antibody end point titers | XBB.1.5 Neutralization |
|--------------|------------|--------------------------------|------------------|----------------------|----------------------------------------------|---------------------------|----------------------|------------------------|--------|----------------------------------------------|------------------------|
| Gammplex     | GSB21226R  | January-24                     | January-21       | October-21           | 200                                          | 20.00                     | 20                   | 20                     | --     | --                                           | --                     |
| Gammplex     | 65B21127   | April-24                       | April-21         | August-21            | 800                                          | 20.00                     | 20                   | 20                     | --     | --                                           | --                     |
| Gammplex     | GSB21134   | April-24                       | April-21         | September-21         | 200                                          | 20.00                     | 20                   | 20                     | --     | --                                           | --                     |
| Gammplex     | GSB21180   | May-24                         | May-21           | November-21          | 800                                          | 20.00                     | 20                   | 20                     | --     | --                                           | --                     |
| Gammplex     | GSC21216   | May-24                         | May-21           | January-22           | 3200                                         | 20.00                     | 20                   | 20                     | --     | --                                           | --                     |
| Gammplex     | GSB21274   | September-24                   | September-21     | December-21          | 3200                                         | 33.97                     | 34.51                | 20                     | --     | --                                           | --                     |
| Gammplex     | GSB21297   | October-24                     | October-21       | January-22           | 3200                                         | 20.31                     | 20                   | 20                     | --     | --                                           | --                     |

| IVIg product | Lot number | Expiration date (refrigerated) | Manufacture Date | First Infusion Month | Anti-Wuhan-1 spike antibody end point titers | Washington Neutralization | Delta Neutralization | Omicron Neutralization | BQ.1.1 | Anti-XBB.1.5 spike antibody end point titers | XBB.1.5 Neutralization |
|--------------|------------|--------------------------------|------------------|----------------------|----------------------------------------------|---------------------------|----------------------|------------------------|--------|----------------------------------------------|------------------------|
| Gamunex-C    | B3GD00383  | December-22                    | December-19      | November-21          | 50                                           | 20.00                     | 20                   | 20                     | --     | --                                           | --                     |
| Gamunex-C    | B2GE00483  | July-23                        | July-20          | September-21         | 50                                           | 20.00                     | 20                   | 20                     | --     | --                                           | --                     |
| Gamunex-C    | B3GLE01322 | August-23                      | August-20        | August-21            | 200                                          | 20.00                     | 20                   | 20                     | --     | --                                           | --                     |
| Gamunex-C    | B3GE00633  | September-23                   | September-20     | August-21            | 800                                          | 20.00                     | 20                   | 20                     | --     | --                                           | --                     |
| Gamunex-C    | B1GKE00453 | October-23                     | October-20       | August-21            | 800                                          | 20.00                     | 20                   | 20                     | --     | --                                           | --                     |
| Gamunex-C    | B8GE00733  | October-23                     | October-20       | August-21            | 800                                          | 20.00                     | 20                   | 20                     | --     | --                                           | --                     |
| Gamunex-C    | B8GE00743  | October-23                     | October-20       | September-21         | 800                                          | 20.00                     | 20                   | 20                     | --     | --                                           | --                     |
| Gamunex-C    | A3GE00693  | October-23                     | October-20       | August-21            | 200                                          | 20.00                     | 20                   | 20                     | --     | --                                           | --                     |
| Gamunex-C    | B2HE00113  | October-23                     | October-20       | November-22          | 50                                           | --                        | --                   | --                     | --     | --                                           | --                     |
| Gamunex-C    | A3GE00753  | October-23                     | October-20       | September-21         | 200                                          | 20.00                     | 20                   | 20                     | --     | --                                           | --                     |
| Gamunex-C    | B1GE00803  | October-23                     | November-20      | February-22          | 200                                          | 20.00                     | 20                   | 20                     | --     | --                                           | --                     |
| Gamunex-C    | B8GMF00173 | January-24                     | January-21       | November-21          | 800                                          | 20.00                     | 20                   | 20                     | --     | --                                           | --                     |
| Gamunex-C    | A1GKF00072 | February-24                    | February-21      | August-21            | 200                                          | 20.00                     | 20                   | 20                     | --     | --                                           | --                     |
| Gamunex-C    | B2GKF00113 | February-24                    | February-21      | August-21            | 200                                          | 20.00                     | 20                   | 20                     | --     | --                                           | --                     |
| Gamunex-C    | B3GJF00163 | March-24                       | March-21         | September-21         | 800                                          | 20.00                     | 20                   | 20                     | --     | --                                           | --                     |
| Gamunex-C    | B2GJF00213 | March-24                       | March-21         | October-21           | 800                                          | 20.00                     | 20                   | 20                     | --     | --                                           | --                     |
| Gamunex-C    | A4GKF00112 | March-24                       | March-21         | September-21         | 800                                          | 20.00                     | 20                   | 20                     | --     | --                                           | --                     |
| Gamunex-C    | A4GKF00132 | March-24                       | March-21         | October-21           | 800                                          | 20.00                     | 20                   | 20                     | --     | --                                           | --                     |
| Gamunex-C    | B3GKF00183 | March-24                       | March-21         | August-21            | 3200                                         | 20.00                     | 20                   | 20                     | --     | --                                           | --                     |
| Gamunex-C    | B1GJF00323 | March-24                       | March-21         | December-21          | 800                                          | 26.30                     | 20                   | 20                     | --     | --                                           | --                     |
| Gamunex-C    | B8GKF00243 | April-24                       | April-21         | August-21            | 3200                                         | 20.00                     | 20                   | 20                     | --     | --                                           | --                     |
| Gamunex-C    | B8GMF00363 | April-24                       | April-21         | August-21            | 800                                          | 50.12                     | --                   | --                     | --     | --                                           | --                     |
| Gamunex-C    | A4GMF00383 | April-24                       | April-21         | August-21            | 3200                                         | 20.00                     | 20                   | 20                     | --     | --                                           | --                     |
| Gamunex-C    | B8GKF00233 | April-24                       | April-21         | September-21         | 3200                                         | 20.00                     | 20                   | 20                     | --     | --                                           | --                     |
| Gamunex-C    | B8GMF00403 | April-24                       | April-21         | August-21            | 12800                                        | 27.00                     | 20                   | 20                     | --     | --                                           | --                     |
| Gamunex-C    | B3GJF00453 | April-24                       | May-21           | January-22           | 3200                                         | 20.00                     | 20                   | 20                     | --     | --                                           | --                     |
| Gamunex-C    | B8GJF00463 | May-24                         | May-21           | December-21          | 3200                                         | 21.63                     | 24.71                | 20                     | --     | --                                           | --                     |
| Gamunex-C    | A4GLF00642 | May-24                         | May-21           | August-21            | 800                                          | 20.00                     | 20                   | 20                     | --     | --                                           | --                     |
| Gamunex-C    | B1GKF00283 | May-24                         | May-21           | November-21          | 3200                                         | 20.00                     | 70.11                | 20                     | --     | --                                           | --                     |
| Gamunex-C    | B2GMF00453 | May-24                         | May-21           | September-21         | 3200                                         | 20.00                     | 20                   | 20                     | --     | --                                           | --                     |
| Gamunex-C    | B8GMF00503 | May-24                         | May-21           | August-21            | 51200                                        | 93.69                     | 60.01                | 20                     | --     | --                                           | --                     |
| Gamunex-C    | A1GKF00312 | June-24                        | June-21          | November-21          | 12800                                        | 117.60                    | 102.9                | 20.00                  | --     | --                                           | --                     |
| Gamunex-C    | B8GLF00653 | May-24                         | June-21          | August-21            | 3200                                         | 65.41                     | 48.63                | 20                     | --     | --                                           | --                     |
| Gamunex-C    | A4GLF00663 | May-24                         | June-21          | August-21            | 3200                                         | 20.00                     | 20                   | 20                     | --     | --                                           | --                     |
| Gamunex-C    | A1GKF00272 | June-24                        | June-21          | December-21          | 12800                                        | 88.47                     | 91.95                | 20                     | --     | --                                           | --                     |
| Gamunex-C    | B1GLF00683 | June-24                        | June-21          | August-21            | 12800                                        | 26.00                     | 20                   | 20                     | --     | --                                           | --                     |
| Gamunex-C    | B8GKF00343 | June-24                        | June-21          | December-21          | 12800                                        | 190.10                    | 309.2                | 20                     | --     | --                                           | --                     |
| Gamunex-C    | B2GJF00033 | January-24                     | June-21          | September-21         | 800                                          | 20.00                     | 20                   | 20                     | --     | --                                           | --                     |
| Gamunex-C    | A4GLF00792 | July-24                        | July-21          | August-21            | 12800                                        | 196.70                    | 228.2                | 20                     | --     | --                                           | --                     |
| Gamunex-C    | A1GLF00802 | July-24                        | July-21          | October-21           | 51200                                        | 495.60                    | 432                  | 20                     | --     | --                                           | --                     |
| Gamunex-C    | B8GKF00353 | July-24                        | July-21          | January-22           | 51200                                        | 184.40                    | 123.6                | 20                     | --     | --                                           | --                     |
| Gamunex-C    | B1GJF00713 | July-24                        | July-21          | April-22             | 12800                                        | 91.33                     | 110.2                | 20                     | --     | --                                           | --                     |
| Gamunex-C    | A4GLF00922 | July-24                        | August-21        | October-21           | 51200                                        | 528.40                    | 495.3                | 30.62                  | --     | --                                           | --                     |
| Gamunex-C    | A1GLF01042 | August-24                      | August-21        | November-21          | 51200                                        | 593.20                    | 814.2                | 59.52                  | --     | --                                           | --                     |
| Gamunex-C    | B4GLF00923 | August-24                      | September-21     | December-21          | 12800                                        | 60.24                     | 265.9                | 20                     | --     | --                                           | --                     |
| Gamunex-C    | A01F000572 | September-24                   | September-21     | January-22           | 204800                                       | 407.00                    | 183                  | 20                     | --     | --                                           | --                     |
| Gamunex-C    | A01F002332 | October-24                     | October-21       | December-21          | 51200                                        | 374.20                    | 386.5                | 20                     | --     | --                                           | --                     |
| Gamunex-C    | A04F005362 | October-24                     | October-21       | March-22             | 51200                                        | 263.10                    | 479.5                | 29.46                  | --     | --                                           | --                     |
| Gamunex-C    | B08F008573 | October-24                     | October-21       | February-22          | 51200                                        | 259.80                    | 413.3                | 31.78                  | --     | --                                           | --                     |
| Gamunex-C    | B01F009943 | October-24                     | October-21       | April-22             | 12800                                        | 156.30                    | 151.2                | 20                     | --     | --                                           | --                     |
| Gamunex-C    | A01F009322 | November-24                    | November-21      | February-22          | 51200                                        | 291.50                    | 429.9                | 38.01                  | --     | --                                           | --                     |
| Gamunex-C    | B01F011803 | November-24                    | November-21      | April-22             | 12800                                        | 282.80                    | 315                  | 20                     | --     | --                                           | --                     |
| Gamunex-C    | B08F012473 | November-24                    | November-21      | February-22          | 12800                                        | 627.90                    | 534.5                | 36.91                  | --     | --                                           | --                     |
| Gamunex-C    | A01F018912 | December-24                    | December-21      | March-22             | 51200                                        | 475.70                    | 699.5                | 45.47                  | --     | --                                           | --                     |
| Gamunex-C    | B08G000473 | December-24                    | December-21      | April-22             | 51200                                        | 346.40                    | 498.5                | 26.94                  | --     | --                                           | --                     |
| Gamunex-c    | B02G074903 | April-25                       | April-22         | November-22          | 51200                                        | 499.10                    | --                   | 189.3                  | 56.32  | --                                           | --                     |

|           |            |           |           |             |        |         |    |       |       |        |       |
|-----------|------------|-----------|-----------|-------------|--------|---------|----|-------|-------|--------|-------|
| Gamunex-c | B08G040013 | May-25    | May-22    | October-22  | 204800 | 1102.00 | -- | 160.4 | 21.44 | 204800 | 20.00 |
| Gamunex-c | A01G041723 | May-25    | May-22    | October-22  | 204800 | 1411.00 | -- | 254.9 | 30.84 | 51200  | 21.64 |
| Gamunex-c | A01G037042 | June-25   | June-22   | October-22  | 204800 | 1537.00 | -- | 389.2 | 51.42 | 204800 | 38.64 |
| Gamunex-c | B03G048513 | June-25   | June-22   | November-22 | 51200  | 1735.00 | -- | 331.6 | 59.07 | --     | --    |
| Gamunex-c | B02G048603 | June-25   | June-22   | October-22  | 204800 | 1079.00 | -- | 223.7 | 36.96 | --     | --    |
| Gamunex-c | B02G038632 | June-25   | June-22   | October-22  | 204800 | 1034.00 | -- | 220.9 | 33.82 | --     | --    |
| Gamunex-c | B01G039282 | July-25   | July-22   | October-22  | 204800 | 1523.00 | -- | 309.3 | 54.84 | 51200  | 55.81 |
| Gamunex-c | R02G055743 | July-25   | July-22   | October-22  | 204800 | 875.00  | -- | 181.5 | 39.39 | 51200  | 20.39 |
| Gamunex-c | B01G058583 | July-25   | July-22   | November-22 | 204800 | 907.50  | -- | 239.9 | 71.79 | --     | --    |
| Gamunex-c | B01G058243 | July-25   | July-22   | November-22 | 204800 | 857.90  | -- | 170.8 | 27.38 | --     | --    |
| Gamunex-c | B03G059323 | July-25   | July-22   | November-22 | 51200  | 567.80  | -- | 137.1 | 26.55 | --     | --    |
| Gamunex-c | A01G039862 | July-25   | July-22   | November-22 | 51200  | 3093.00 | -- | 249.4 | 44.79 | --     | --    |
| Gamunex-c | B01G061903 | July-25   | July-22   | November-22 | 204800 | 808.00  | -- | 221.6 | 31.59 | --     | --    |
| Gamunex-c | A04G061913 | July-25   | July-22   | November-22 | 51200  | 942.60  | -- | 82.18 | 20    | --     | --    |
| Gamunex-c | B03G063163 | July-25   | July-22   | November-22 | 51200  | 1303.00 | -- | 197.1 | 27.32 | --     | --    |
| Gamunex-c | A04G063263 | July-25   | July-22   | November-22 | 51200  | 2121.00 | -- | 115.4 | 20.43 | --     | --    |
| Gamunex-c | B01G067063 | August-25 | August-22 | November-22 | 204800 | 686.50  | -- | 209.1 | 24.15 | --     | --    |
| Gamunex-c | B01G045372 | August-25 | August-22 | November-22 | 204800 | 904.60  | -- | 186.4 | 32.86 | --     | --    |
| Gamunex-c | B01G048792 | August-25 | August-22 | November-22 | 51200  | 561.20  | -- | 129.2 | 31.14 | --     | --    |

| IVIG product | Lot number | Expiration date (refrigerated) | Manufacture Date | First Infusion Month | Anti-Wuhan-1 spike antibody end point titers | Washington Neutralization | Delta Neutralization | Omicron Neutralization | BQ.1.1 | Anti-XBB.1.5 spike antibody end point titers | XBB.1.5 Neutralization |
|--------------|------------|--------------------------------|------------------|----------------------|----------------------------------------------|---------------------------|----------------------|------------------------|--------|----------------------------------------------|------------------------|
| Hizentra     | P100299150 | August-22                      | February-20      | October-21           | 50                                           | 20.00                     | 20                   | 20                     | --     | --                                           | --                     |
| Hizentra     | P100283113 | May-23                         | November-20      | November-21          | 50                                           | 20.00                     | 20                   | 20                     | --     | --                                           | --                     |
| Hizentra     | p100295167 | June-23                        | December-20      | August-21            | 800                                          | 20.00                     | 20                   | 20                     | --     | --                                           | --                     |
| Hizentra     | p100298818 | July-23                        | January-21       | September-21         | 800                                          | 20.00                     | 20                   | 20                     | --     | --                                           | --                     |
| Hizentra     | P100301497 | July-23                        | January-21       | August-21            | 800                                          | 20.00                     | 20                   | 20                     | --     | --                                           | --                     |
| Hizentra     | P100303965 | July-23                        | January-21       | August-21            | 800                                          | 20.00                     | 20                   | 20                     | --     | --                                           | --                     |
| Hizentra     | p100305419 | August-23                      | February-21      | August-21            | 800                                          | 20.00                     | 20                   | 20                     | --     | --                                           | --                     |
| Hizentra     | p100308202 | August-23                      | February-21      | September-21         | 800                                          | 20.00                     | 20                   | 20                     | --     | --                                           | --                     |
| Hizentra     | P100308204 | August-23                      | February-21      | August-21            | 200                                          | 20.00                     | 20                   | 20                     | --     | --                                           | --                     |
| Hizentra     | P100313109 | August-23                      | February-21      | August-21            | 200                                          | 20.00                     | 20                   | 20                     | --     | --                                           | --                     |
| Hizentra     | P100317961 | September-23                   | March-21         | August-21            | 800                                          | 20.00                     | 20                   | 20                     | --     | --                                           | --                     |
| Hizentra     | P100317965 | September-23                   | March-21         | August-21            | 800                                          | 20.00                     | 20                   | 20                     | --     | --                                           | --                     |
| Hizentra     | P100317968 | September-23                   | March-21         | September-21         | 800                                          | 20.00                     | 20                   | 20                     | --     | --                                           | --                     |
| Hizentra     | P100320293 | September-23                   | March-21         | November-21          | 800                                          | 20.00                     | 20                   | 20                     | --     | --                                           | --                     |
| Hizentra     | P100320296 | September-23                   | March-21         | August-21            | 3200                                         | 30.00                     | 32                   | 20                     | --     | --                                           | --                     |
| Hizentra     | P100320297 | September-23                   | March-21         | October-21           | 200                                          | 20.00                     | 20                   | 20                     | --     | --                                           | --                     |
| Hizentra     | P100325992 | September-23                   | March-21         | August-21            | 800                                          | 20.00                     | 20                   | 20                     | --     | --                                           | --                     |
| Hizentra     | P100325987 | September-23                   | March-21         | October-21           | 800                                          | 20.00                     | 20                   | 20                     | --     | --                                           | --                     |
| Hizentra     | P100325989 | September-23                   | March-21         | November-21          | 800                                          | 32.09                     | --                   | --                     | --     | --                                           | --                     |
| Hizentra     | P100325993 | September-23                   | March-21         | September-21         | 3200                                         | 20.00                     | 20                   | 20                     | --     | --                                           | --                     |
| Hizentra     | P100325990 | October-23                     | April-21         | September-21         | 800                                          | 20.00                     | 20                   | 20                     | --     | --                                           | --                     |
| Hizentra     | P100328020 | October-23                     | April-21         | December-21          | 800                                          | 20.00                     | 20                   | 20                     | --     | --                                           | --                     |
| Hizentra     | P100329758 | October-23                     | April-21         | September-21         | 200                                          | 20.00                     | 20                   | 20                     | --     | --                                           | --                     |
| Hizentra     | P100334886 | October-23                     | April-21         | October-21           | 3200                                         | 20.00                     | 20                   | 20                     | --     | --                                           | --                     |
| Hizentra     | P100340458 | November-23                    | May-21           | December-21          | 200                                          | 20.00                     | 20                   | 20                     | --     | --                                           | --                     |
| Hizentra     | P100345824 | December-23                    | June-21          | November-21          | 3200                                         | 46.76                     | 50.46                | 20                     | --     | --                                           | --                     |
| Hizentra     | P100348234 | December-23                    | June-21          | February-22          | 12800                                        | 97.10                     | 83.4                 | 20                     | --     | --                                           | --                     |
| Hizentra     | P100354761 | December-23                    | June-21          | January-22           | 12800                                        | 155.90                    | 140.8                | 20                     | --     | --                                           | --                     |
| Hizentra     | P100354768 | December-23                    | June-21          | February-22          | 3200                                         | 20.00                     | 20                   | 20                     | --     | --                                           | --                     |
| Hizentra     | P100359895 | January-24                     | July-21          | March-22             | 800                                          | 20.00                     | 20                   | 20                     | --     | --                                           | --                     |
| Hizentra     | P100359898 | January-24                     | July-21          | March-22             | 12800                                        | 89.79                     | 69.12                | 20                     | --     | --                                           | --                     |
| Hizentra     | P100371306 | March-24                       | September-21     | February-22          | 12800                                        | 314.30                    | 198.2                | 20                     | --     | --                                           | --                     |
| Hizentra     | P100386620 | May-24                         | November-21      | March-22             | 51200                                        | 209.10                    | 169.4                | 20                     | --     | --                                           | --                     |

| IVIG product | Lot number | Expiration date (refrigerated) | Manufacture Date | First Infusion Month | Anti-Wuhan-1 spike antibody end point titers | Washington Neutralization | Delta Neutralization | Omicron Neutralization | BQ.1.1 | Anti-XBB.1.5 spike antibody end point titers | XBB.1.5 Neutralization |
|--------------|------------|--------------------------------|------------------|----------------------|----------------------------------------------|---------------------------|----------------------|------------------------|--------|----------------------------------------------|------------------------|
| Hyqvia       | LE16X003AA | November-23                    | January-21       | September-21         | 50                                           | 20.00                     | 20                   | 20                     | --     | --                                           | --                     |
| Hyqvia       | LE16X129AA | March-23                       | May-21           | March-22             | 12800                                        | 71.79                     | 87.01                | 20                     | --     | --                                           | --                     |
| Hyqvia       | LE16X156AA | March-23                       | June-21          | December-21          | 12800                                        | 160.10                    | 81.33                | 20                     | --     | --                                           | --                     |
| Hyqvia       | LE16X184AA | July-24                        | July-21          | March-22             | 51200                                        | 450.60                    | 410.1                | 20                     | --     | --                                           | --                     |
| Hyqvia       | LE16X192AA | July-24                        | August-21        | February-22          | 51200                                        | 533.00                    | 175                  | 21                     | --     | --                                           | --                     |
| Hyqvia       | LE16X217AA | July-24                        | September-21     | March-22             | 51200                                        | 634.00                    | 287                  | 20                     | --     | --                                           | --                     |
| Hyqvia       | BE16C005AB | December-24                    | December-21      | October-22           | 12800                                        | 390.80                    | --                   | 26.35                  | 20     | 51200                                        | 20.00                  |
| Hyqvia       | BE16C068AA | December-24                    | December-21      | October-22           | 12800                                        | 522.90                    | --                   | 52.83                  | 20     | 204800                                       | 20.00                  |
| Hyqvia       | BE16C097AA | January-25                     | January-22       | November-22          | 51200                                        | 1682.00                   | --                   | 278.8                  | 48.69  | 204800                                       | 36.36                  |
